# Supplementary material for: Overexpression of UBE2C in esophageal squamous cell carcinoma tissues and molecular analysis
Source: PubMed Central journal article supplement (PMC8422647; doi:10.1186/s12885-021-08634-6), 2021-09-06
Supplement: 12885_2021_8634_MOESM1_ESM.pdf [file 12885_2021_8634_MOESM1_ESM.pdf]

**Table S1** Expression of UBE2C in ESCC.

| Accession        | Exp n | Exp mean | Exp sd   | Ctrl n | Ctrl mean | Ctrl sd  | p value  | AUC    |
|------------------|-------|----------|----------|--------|-----------|----------|----------|--------|
| GPL570           | 329   | 9.669028 | 0.777051 | 68     | 7.972496  | 0.772762 | <0.001   | 0.9438 |
| GPL571           | 127   | 9.025992 | 1.319753 | 83     | 7.534212  | 1.276483 | <0.001   | 0.7703 |
| GSE23400GPL96    | 53    | 9.549963 | 0.54492  | 53     | 8.2421    | 0.442618 | <0.001   | 0.9573 |
| GSE32424         | 7     | 4.402059 | 0.588172 | 5      | 1.548651  | 0.771019 | <0.001   | 1      |
| GSE45168         | 5     | 12.44534 | 0.316927 | 5      | 9.7075    | 1.891234 | 0.012755 | 1      |
| GSE70409         | 17    | 11.30276 | 1.234927 | 17     | 8.9822    | 0.861644 | <0.001   | 0.9481 |
| TCGA-GETX        | 82    | 11.98372 | 0.874241 | 1456   | 6.076742  | 3.350544 | <0.001   | 0.9794 |
| in house RNA-seq | 8     | 5.841758 | 0.563671 | 8      | 2.204144  | 1.4291   | <0.001   | 1      |
| in house IHC     | 144   | 8.638889 | 2.471123 | 142    | 6.429577  | 1.776114 | <0.001   | 0.7567 |

**Table S2** Expression of HCP5 in ESCC.

| Accession     | Exp n | Exp mean | Exp sd   | Ctrl n | Ctrl mean | Ctrl sd  | p value  |
|---------------|-------|----------|----------|--------|-----------|----------|----------|
| GPL570        | 329   | 8.555206 | 1.048541 | 68     | 7.479011  | 1.017334 | <0.001   |
| GPL571        | 127   | 8.082094 | 1.150129 | 83     | 6.7176    | 1.31579  | <0.001   |
| GSE23400GPL96 | 53    | 8.05     | 0.75465  | 53     | 7.497087  | 0.44321  | <0.001   |
| GSE32424      | 7     | 11.62143 | 4.73652  | 5      | 2.806     | 0.819225 | 0.002    |
| GSE45168      | 5     | 8.7137   | 0.601044 | 5      | 7.9568    | 0.724019 | 0.11     |
| GSE70409      | 17    | 12.6597  | 1.627955 | 17     | 11.3129   | 0.89266  | 0.005317 |
| GSE45350      | 4     | 10.11665 | 1.043032 | 4      | 9.4875    | 0.24832  | 0.285    |
| TCGA-GETX     | 82    | 11.7706  | 1.45737  | 1456   | 9.469327  | 0.958751 | <0.001   |

**Table S3** Expression of hsa-miR-139-5p in ESCC.

| Accession | Exp n | Exp mean | Exp sd   | Ctrl n | Ctrl mean | Ctrl sd  | p value  |
|-----------|-------|----------|----------|--------|-----------|----------|----------|
| GSE43732  | 119   | -4.5982  | 3.777475 | 119    | -5.0692   | 0.481332 | 0.178585 |
| GSE71043  | 3     | -3.31519 | 0.009805 | 3      | -3.1974   | 0.08861  | 0.084083 |
| GSE112840 | 52    | 1.5035   | 2.01996  | 52     | 1.492885  | 1.97522  | 0.979    |
| GSE114110 | 30    | -5.3308  | 2.82095  | 10     | -0.6218   | 0.511748 | <0.001   |
| GSE59973  | 3     | -7.64201 | 0.520969 | 3      | -5.24623  | 0.399646 | 0.003    |
| TCGA      | 95    | 5.0254   | 0.903825 | 12     | 6.7158    | 0.783637 | <0.001   |

**Table S4** Information of included RNA-seq and microarray.

| Author                  | Year | Country | Data source | Test method/Platform   | Sample type | RNA type    |
|-------------------------|------|---------|-------------|------------------------|-------------|-------------|
|                         |      | China   | IHC         | NR                     | Tissue      | mRNA/lncRNA |
|                         |      | China   | RNA-seq     | NR                     | Tissue      | mRNA/lncRNA |
| TCGA                    |      | USA     | TCGA        | NR                     | Tissue      | mRNA/lncRNA |
| Jing Wen et al          | 2014 | China   | GSE45670    | Affymetrix GPL570      | Tissue      | mRNA/lncRNA |
| Kory R Johnson et al    | 2017 | USA     | GSE77861    | Affymetrix GPL570      | Tissue      | mRNA/lncRNA |
| Qing Wang et al         | 2013 | Germany | GSE26886    | Affymetrix GPL570      | Tissue      | mRNA/lncRNA |
| Hiroki Sasaki et al     | 2017 | Japan   | GSE69925    | Affymetrix GPL570      | Tissue      | mRNA/lncRNA |
| Xiaoyan Ming et al      | 2017 | China   | GSE100942   | Affymetrix GPL570      | Tissue      | mRNA/lncRNA |
| Grace Fu et al          | 2011 | China   | GSE33810    | Affymetrix GPL570      | Tissue      | mRNA/lncRNA |
| Hiroshi Nakagawa et al  | 2009 | USA     | GSE17351    | Affymetrix GPL570      | Tissue      | mRNA/lncRNA |
| Robert J Clifford et al | 2011 | USA     | GSE20347    | Affymetrix GPL571      | Tissue      | mRNA/lncRNA |
| Howard Yanget al        | 2015 | USA     | GSE38129    | Affymetrix GPL571      | Tissue      | mRNA/lncRNA |
| Wusheng Yanet al        | 2011 | USA     | GSE29001    | Affymetrix GPL571      | Tissue      | mRNA/lncRNA |
| Wusheng Yan et al       | 2011 | USA     | GSE33426    | Affymetrix GPL571      | Tissue      | mRNA/lncRNA |
| Howard Yanget al        | 2010 | USA     | GSE23400    | Affymetrix GPL96/GPL97 | Tissue      | mRNA/lncRNA |
| Yunjuan Bao et al       | 2012 | USA     | GSE32424    | Illumina GPL10999      | Tissue      | mRNA/lncRNA |
| wang liang et al        | 2013 | China   | GSE45168    | Agilent GPL13497       | Tissue      | mRNA/lncRNA |
| Chun-ei Tung et al      | 2015 | China   | GSE70409    | Phalanx GPL13287       | Tissue      | mRNA/lncRNA |
| Wei Wu et al            | 2013 | Canada  | GSE45350    | Agilent GPL13607       | Tissue      | mRNA/lncRNA |
| Jiagen Li et al         | 2014 | China   | GSE43732    | Agilent GPL16543       | Tissue      | miRNA       |
| Jing Wen et al          | 2018 | China   | GSE114110   | Agilent GPL24967       | Tissue      | miRNA       |
| Rui hua shi et al       | 2015 | China   | GSE59973    | Agilent GPL16770       | Tissue      | miRNA       |
| Fen Liu et al           | 2019 | China   | GSE112840   | Agilent GPL23365       | serum       | miRNA       |
| Juan Liao et al         | 2015 | China   | GSE71043    | Agilent GPL18402       | blood       | miRNA       |
